# Supplementary material
Source: publisher figshare collection journal article supplement (https://acs.figshare.com/ndownloader/files/5100400)
Supplement: Supplementary file 1 [file 5100400]

**Cuprophilicity Induced Cocrystallization of  $[\text{Cu}_2(4,4'\text{-bpy})(\text{CN})_2]_n$  Sheets and  $[\text{Cu}(\text{SCN})]_n$  Chains into a Three-Dimensional Pseudo-polyrotaxane**

Xian-Ming Zhang,\* Zhen-Ming Hao, Hai-Shun Wu

*School of Chemistry & Material Science, Shanxi Normal University, Linfen 041004, P.*

*R. China. Fax: Int. code +86 357 2051402; E-mail: [zhangxm@dns.sxtu.edu.cn](mailto:zhangxm@dns.sxtu.edu.cn)*

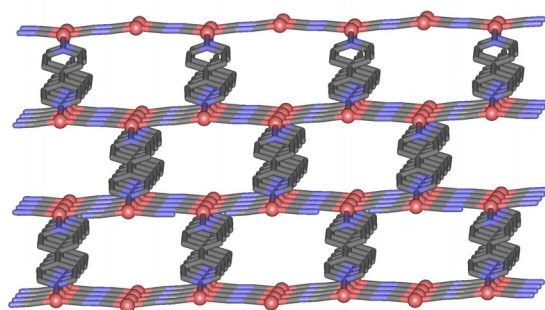

Fig. S1 View of stacking of  $[\text{Cu}_2(4,4'\text{-bpy})(\text{CN})_2]_n$  along the  $c$ -axis direction showing the channels.

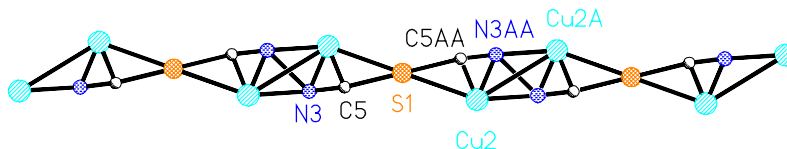

Fig. S2 View of the disordered  $[\text{Cu}(\text{SCN})]_n$  chain.

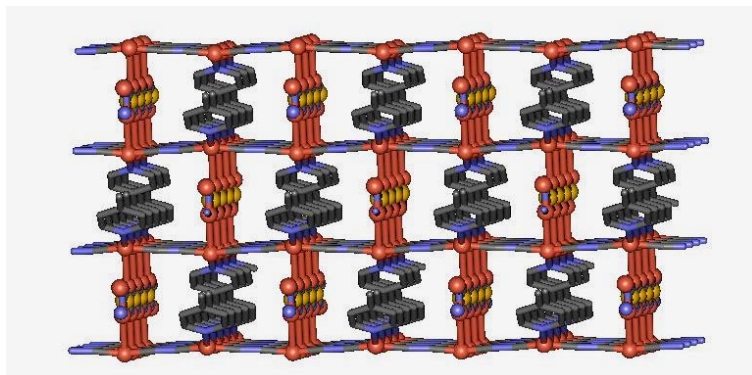

Fig. S3 View of the 3-D pseudo-polyrotaxane along the  $c$ -axis direction showing dually disordered  $[\text{Cu}(\text{SCN})]_n$  chains penetrating 2-D  $[\text{Cu}_2(4,4'\text{-bpy})(\text{CN})_2]_n$  layers and unsupported  $\text{Cu}^{\text{I}}\text{-Cu}^{\text{I}}$  interactions.

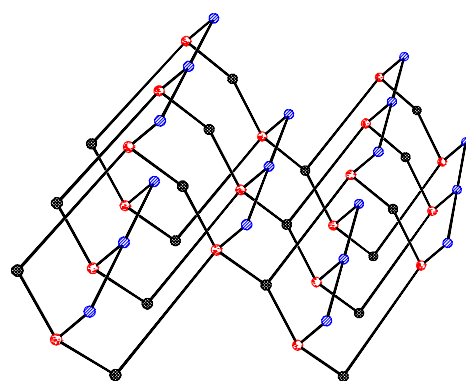

Fig. S4 Schematic view of the 3-D trinodal (3,4)-connected net. The three different nodes are shown in red, black and blue color, respectively.

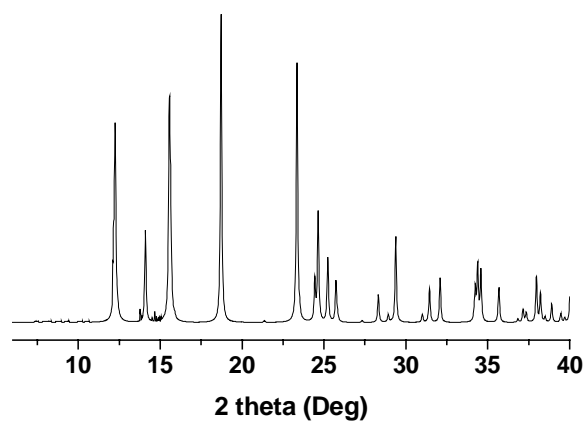

Fig. S5 X-ray powdered diffraction pattern of **1**.

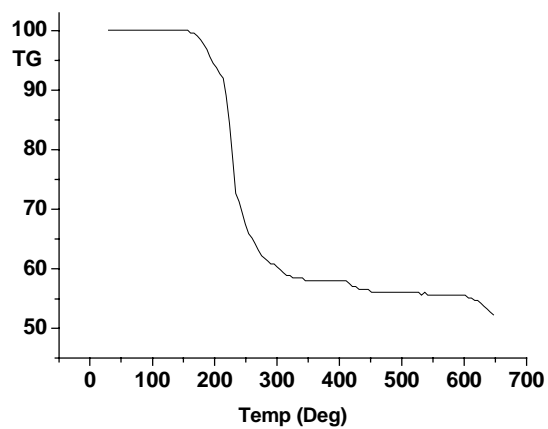

Fig. S6 TGA curve of **1** in air at the heating rate of 10 °C per minute.

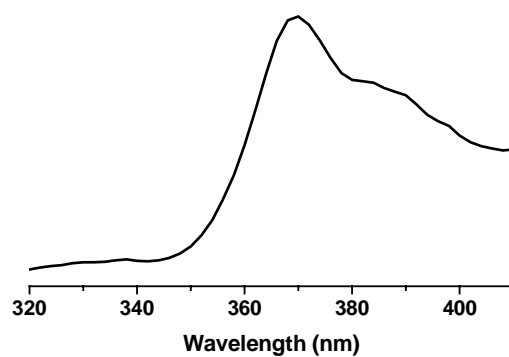

Fig. S7 Photoluminescent emission spectrum of **1**  $\lambda_{\text{ex}} = 220$  nm at room temperature.

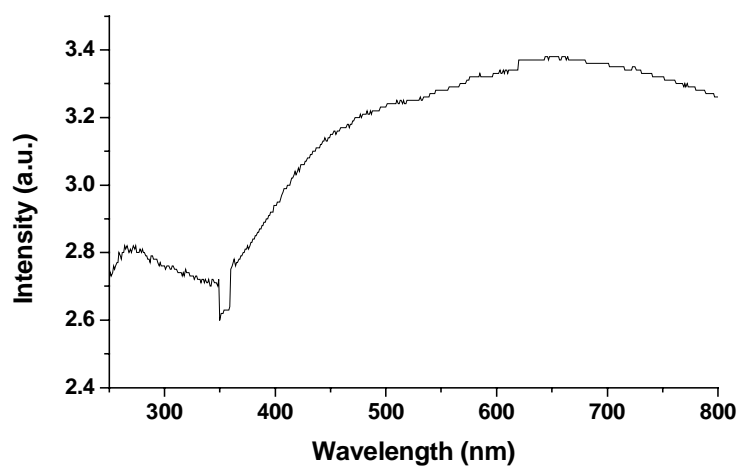

Fig. S8 The Solid UV-vis spectrum of **1** in KBr pallet.
